# Supplementary material for: Novel Insights for Patients with Multiple Basal Cell Carcinomas and Tumors at High-Risk for Recurrence: Risk Factors, Clinical Morphology, and Dermatoscopy
Source: MDPI journal article supplement (doi:10.3390/cancers13133208), 2021-06-27
Supplement: s1 [file s1]

**Table S1. Definition of dermatoscopic terms and criteria<sup>4, 19</sup>**

|                                                                         |                                                                  |
|-------------------------------------------------------------------------|------------------------------------------------------------------|
| <b>Vasculature*</b>                                                     | The presence of vascular features                                |
| None / Apparent <50% / Prominent ≥50%<br><br>(lesion's total surface)   |                                                                  |
| <b>Vessels</b>                                                          | Pink to Red Vascular structures                                  |
| Arborizing                                                              | In-focused, bright red, tree-branched vessels                    |
| Telangiectasias                                                         | Short, fine linear vessels with very few<br><br>branches         |
| Glomerular                                                              | Tortuous vessels                                                 |
| Linear                                                                  | Serpentine vessels irregular in shape and<br><br>width           |
| Dotted                                                                  | Vessels as dots arranged fairly closely                          |
| Hairpin                                                                 | Looped vessels                                                   |
| Polymorphous                                                            | A combination of ≥2 different types of<br><br>vessels            |
| <b>Erosions / Ulcerations*</b>                                          | Loss of the epidermis presented as orange<br><br>to black crusts |
| None / Erosions / Prominent <90% / >90%<br><br>(lesion's total surface) |                                                                  |
| <b>Pigmentation*</b>                                                    | The presence of pigmented structures                             |

|                                                                             |                                                                                                                 |
|-----------------------------------------------------------------------------|-----------------------------------------------------------------------------------------------------------------|
| None / Light <10% / Partial 10-50% / Heavy<br>>50% (lesion's total surface) |                                                                                                                 |
| Blue-gray ovoid nests/globules                                              | Ovoid, well-circumscribed, plump blue-gray globular structures                                                  |
| Blue-gray dots                                                              | Pin-point closely arranged blue-gray dots                                                                       |
| Spoke-wheel structures                                                      | Well-circumscribed radial projections meeting at a darker globular center (light to dark brown/black/blue-gray) |
| Leaf-like structures                                                        | Peripheral light brown to bluish bulbous projections resembling maple leaf                                      |

**Table S2. Solitary and multiple BCC tumors characteristics, n=304**

|                                                         | <b>Total (n=304)</b> | <b>Solitary<br/>(n=172)</b> | <b>Multiple<br/>(n=132)</b> |
|---------------------------------------------------------|----------------------|-----------------------------|-----------------------------|
| <b>Number of patients, <i>n</i>=225 (%)</b>             | 225 (100)            | 172 (76.4)                  | 53 (23.6)                   |
| <b>Number of BCC, n(%)</b>                              | 304 (100)            | 172 (56.6)                  | 132 (43.4)                  |
| <i>Number of tumors per individual, n=53(%)</i>         |                      |                             |                             |
| 2                                                       |                      |                             | 38 (71.7)                   |
| 3                                                       |                      |                             | 9 (17.1)                    |
| 4                                                       |                      |                             | 3 (5.6)                     |
| ≥5                                                      |                      |                             | 3 (5.6)                     |
| <b>Anatomic location, n(%)</b>                          |                      |                             |                             |
| Head/neck                                               | 223 (73.4)           | 128 (74.6)                  | 95 (72)                     |
| Trunk                                                   | 58 (19.1)            | 33 (19.2)                   | 25 (18.9)                   |
| Extremities                                             | 23 (7.5)             | 11 (6.4)                    | 12 (9.1)                    |
| <b>Diameter, median (range) cm</b>                      | 0.9 (0.2 – 12.3)     | 0.95 (0.3-12.3)             | 0.85 (0.2-7.2)              |
| <b>Risk for local recurrence &amp; metastasis, n(%)</b> |                      |                             |                             |
| Low-risk                                                | 92 (30.3)            | 46 (26.7)                   | 46 (34.8)                   |
| High-risk                                               | 212 (69.7)           | 126 (73.3)                  | 86 (65.2)                   |
| <b>Histopathology</b>                                   |                      |                             |                             |

|                                        |            |            |            |
|----------------------------------------|------------|------------|------------|
| <b>Indolent growth pattern, n(%)</b>   | 224 (73.7) | 122 (70.9) | 102 (77.3) |
| Nodular                                | 175 (78.1) | 96 (78.7)  | 79 (77.4)  |
| Superficial                            | 49 (21.9)  | 26 (21.3)  | 23 (22.6)  |
| <b>Aggressive growth pattern, n(%)</b> | 80 (26.3)  | 50 (29.1)  | 30 (22.7)  |
| Infiltrative                           | 42 (13.8)  | 25 (14.5)  | 17 (12.9)  |
| Morpheiform                            | 1 (0.3)    | 1 (0.6)    | 0          |
| Basosquamous                           | 14 (4.6)   | 10 (5.8)   | 4 (3)      |
| Micro-nodular                          | 2 (0.7)    | 0          | 2 (1.5)    |
| Mixed                                  | 21 (6.9)   | 14 (8.1)   | 7 (5.3)    |

**Table S3. Univariate logistic regression for the clinical features of high-risk Vs. low-risk BCCs**

|                              | <b>p-value</b> | <b>OR</b> | <b>95% CIs</b> |
|------------------------------|----------------|-----------|----------------|
| <b>Margins</b>               | <0.001         | 3.514     | 1.867-6.615    |
| <b>Ulceration</b>            |                |           |                |
| Erosions Vs none             | 0.33           |           |                |
| Prominent Vs none            | <0.001         | 3.782     | 2.039-7.015    |
| >90% vs none                 | <0.001         | 14.184    | 3.237-62.153   |
| <b>Pink color</b>            | 0.417          |           |                |
| <b>Clinical Presentation</b> |                |           |                |
| Elevated vs flat             | 0.001          | 4.5       | 1.92-10.546    |
| Nodular vs flat              | <0.001         | 5.708     | 2.633-12.375   |
| <b>White color</b>           | <0.001         | 3.067     | 1.809-5.202    |
| <b>Blue-black color</b>      | 0.001          | 0.433     | 0.262-0.715    |
| <b>Pigmentation</b>          |                |           |                |
| Light Vs none                | 0.006          | 0.38      | 0.192-0.752    |
| Partial vs none              | 0.032          | 0.443     | 0.211-0.933    |
| Heavy vs none                | 0.31           |           |                |

**Table S4. Multivariate logistic regression analysis for the clinical features of high-risk Vs. low-risk BCCs**

|                              | <b>p-value</b> | <b>OR</b> | <b>95% CIs</b> |
|------------------------------|----------------|-----------|----------------|
| <b>Margins</b>               | 0.067          | 2.007     | 0.952-4.23     |
| <b>Ulceration</b>            |                |           |                |
| Erosions Vs none             | 0.354          |           |                |
| Prominent Vs none            | 0.011          | 2.533     | 1.243-5.162    |
| >90% vs none                 | 0.008          | 9.241     | 1.79-47.711    |
| <b>Clinical Presentation</b> |                |           |                |
| Elevated vs flat             | 0.083          | 2.384     | 0.892-6.376    |
| Nodular vs flat              | 0.004          | 3.674     | 1.502-8.988    |
| <b>White color</b>           | <0.001         | 3.682     | 1.988-6.819    |
| <b>Blue-black color</b>      | 0.071          | 0.193     | 0.032-1.153    |
| <b>Pigmentation</b>          |                |           |                |
| Light Vs none                | 0.504          |           |                |
| Partial vs none              | 0.657          |           |                |
| Heavy vs none                | 0.088          | 5.611     | 0.771-40.82    |

For the final model a fitness of good control was performed based on Hosmer-Lemeshow criterion (p-value=0.547)

**Table S5. Univariate logistic regression analysis for the dermoscopic features of high-risk Vs. low-risk BCCs**

|                             | <b>p-value</b> | <b>OR</b> | <b>95% CIs</b> |
|-----------------------------|----------------|-----------|----------------|
| <b>Vasculature</b>          | 0.394          |           |                |
| <b>Vessels</b>              |                |           |                |
| Arborizing                  | 0.002          | 2.52      | 1.394-4.555    |
| Telangiectasias             | 0.005          | 0.464     | 0.273-0.789    |
| Glomerular                  | 0.008          | 4.24      | 1.446-12.449   |
| Linear irregular            | 0.115          |           |                |
| Dotted                      | N/A            |           |                |
| Hairpin                     | N/A            |           |                |
| Polymorphous                | N/A            |           |                |
| <b>Pigmented structures</b> |                |           |                |
| Blue-gray ovoid globules    | 0.056          | 0.618     | 0.377-1.013    |
| Multiple Dots               | 0.001          | 0.401     | 0.239-0.675    |

|                                         |        |       |              |
|-----------------------------------------|--------|-------|--------------|
| Spoke-Wheel                             | 0.001  | 0.228 | 0.096-0.542  |
| Leaf-like                               | <0.001 | 0.204 | 0.09-0.461   |
| Concentric                              | 0.007  | 0.239 | 0.084-0.678  |
| <b>Pigmentation intensity</b>           |        |       |              |
| Light                                   | <0.001 | 0.301 | 0.162-0.561  |
| Partial                                 | 0.002  | 0.301 | 0.143-0.635  |
| Heavy                                   | 0.032  | 0.437 | 0.205-0.93   |
| <b>Pink-whitish background</b>          | 0.054  | 0.575 | 0.327-1.011  |
| <b>Diffuse white color</b>              | 0.096  | 5.816 | 0.731-46.252 |
| <b>White shiny lines</b>                | 0.002  | 2.304 | 1.352-3.925  |
| <b>Multiple yellow-white globules</b>   | 0.193  |       |              |
| <b>White circles &amp; Yellow Clods</b> | 0.038  | 3.199 | 1.065-9.605  |
| <b>Ulceration</b>                       |        |       |              |
| Erosions vs none                        | 0.8    |       |              |
| Prominent vs none                       | <0.001 | 3.055 | 1.635-5.707  |
| >90% vs. none                           | 0.001  | 12.33 | 2.759-55.104 |

**Table S6. Multivariate logistic regression for the dermoscopic features of high-risk Vs. low-risk BCCs**

|                                         | p-value | OR    | 95% CIs      |
|-----------------------------------------|---------|-------|--------------|
| <b>Vessels</b>                          |         |       |              |
| Glomerular                              | 0.044   | 3.314 | 1.033-10.626 |
| Linear irregular                        | 0.195   |       |              |
| <b>Pigmentation intensity</b>           |         |       |              |
| Light                                   | <0.001  | 0.269 | 0.13-0.558   |
| Partial                                 | 0.001   | 0.198 | 0.078-0.5    |
| Heavy                                   | 0.037   | 0.313 | 0.105-0.934  |
| <b>Pink-whitish background</b>          | 0.021   | 0.369 | 0.158-0.862  |
| <b>Diffuse white color</b>              | 0.128   |       |              |
| <b>White shiny lines</b>                | 0.025   | 2.087 | 1.097-3.971  |
| <b>White circles &amp; Yellow Clods</b> | 0.154   |       |              |
| <b>Ulceration</b>                       |         |       |              |
| Erosions vs none                        | 0.944   |       |              |
| Prominent vs none                       | 0.014   | 2.451 | 1.198-5.014  |
| >90% vs. none                           | 0.01    | 8.042 | 1.637-39.505 |

**Table S7. Dermatoscopic findings in solitary and multiple BCC**

|                                                       | <b>Total<br/>(n=304)</b> | <b>Solitary<br/>(n=172)</b> | <b>Multiple<br/>(n=132)</b> |
|-------------------------------------------------------|--------------------------|-----------------------------|-----------------------------|
| <b>Vasculature, n (%)</b>                             |                          |                             |                             |
| None                                                  | 32 (10.6)                | 21 (12.2)                   | 11 (8.3)                    |
| Apparent                                              | 219 (72)                 | 110 (64)                    | 109 (82.6)                  |
| Prominent                                             | 53 (17.4)                | 41 (23.8)                   | 12 (9.1)                    |
| <b>Vessels, n (%)</b>                                 |                          |                             |                             |
| Arborizing                                            | 247 (81.3)               | 138 (80.2)                  | 109 (82.6)                  |
| Telangiectasias                                       | 82 (27)                  | 49 (28.5)                   | 33 (25)                     |
| Glomerular                                            | 34 (11.2)                | 18 (10.4)                   | 16 (12.1)                   |
| Linear irregular                                      | 14 (4.6)                 | 7 (4.1)                     | 7 (5.3)                     |
| Dotted                                                | 1 (0.3)                  | 1 (0.6)                     | 0                           |
| Hairpin                                               | 3 (1)                    | 3 (1.7)                     | 0                           |
| Polymorphous                                          | 14 (4.6)                 | 10 (5.8)                    | 4 (3)                       |
| <b>Pigmented<br/>structures, n (%)</b>                |                          |                             |                             |
| Blue-gray ovoid<br>globules                           | 127 (41.8)               | 72 (41.9)                   | 55 (41.7)                   |
| Multiple Dots                                         | 90 (29.6)                | 50 (29.1)                   | 40 (30.3)                   |
| Spoke-Wheel                                           | 24 (7.9)                 | 12 (7)                      | 12 (9.1)                    |
| Leaf-like                                             | 28 (9.2)                 | 16 (9.3)                    | 12 (9.1)                    |
| Concentric                                            | 16 (5.3)                 | 12 (7)                      | 4 (3)                       |
| <b>Pigmentation<br/>intensity, n (%)</b>              |                          |                             |                             |
| None                                                  | 141 (46.4)               | 82 (47.7)                   | 59 (44.7)                   |
| Light                                                 | 77 (25.3)                | 41 (23.8)                   | 36 (27.3)                   |
| Partial                                               | 42 (13.8)                | 26 (15.1)                   | 16 (12.1)                   |
| Heavy                                                 | 44 (14.5)                | 23 (13.4)                   | 21 (15.9)                   |
| <b>Pink-whitish<br/>background, n (%)</b>             | 211 (69.4)               | 120 (69.8)                  | 91 (68.9)                   |
| <b>Diffuse white color,<br/>n (%)</b>                 | 11 (3.6)                 | 7 (4.1)                     | 4 (3)                       |
| <b>White shiny lines, n<br/>(%)</b>                   | 123 (40.5)               | 89 (51.7)                   | 34 (25.8)                   |
| <b>Multiple yellow-<br/>white globules, n<br/>(%)</b> | 34 (11.2)                | 28 (16.3)                   | 6 (4.6)                     |
| <b>White circles &amp;<br/>Yellow Clods, n(%)</b>     | 62 (20.4)                | 42 (24.4)                   | 19 (14.4)                   |
| <b>Ulceration, n (%)</b>                              |                          |                             |                             |
| None                                                  | 79 (26)                  | 40 (23.2)                   | 39 (29.6)                   |

|           |            |           |           |
|-----------|------------|-----------|-----------|
| Erosions  | 71 (23.3)  | 40 (23.3) | 31 (23.5) |
| Prominent | 121 (39.8) | 69 (40.1) | 52 (39.4) |
| >90%      | 33 (10.9)  | 23 (13.4) | 10 (7.5)  |

**Table S8. Dermatoscopic features in histologically aggressive subtypes of BCC (n=80)**

|                                           | <b>Aggressive<br/>histologic subtypes<br/>of BCC<br/>(n=80)</b> | <b>High-Risk<br/>(n=212)</b> |
|-------------------------------------------|-----------------------------------------------------------------|------------------------------|
| <b>Vasculature, n (%)</b>                 |                                                                 |                              |
| None                                      | 9 (11.3)                                                        | 19 (9)                       |
| Apparent (<50%)                           | 60 (75)                                                         | 156 (73.6)                   |
| Prominent (≥50%)                          | 11 (13.7)                                                       | 37 (17.4)                    |
| <b>Vessels, n (%)</b>                     |                                                                 |                              |
| Arborizing                                | 69 (86.3)                                                       | 182 (85.9)                   |
| Telangiectasias                           | 23 (28.7)                                                       | 47 (22.2)                    |
| Glomerular                                | 15 (18.7)                                                       | 30 (14.2)                    |
| Linear irregular                          | 8 (10)                                                          | 12 (5.7)                     |
| Dotted                                    | 1 (1.3)                                                         | 1 (0.5)                      |
| Hairpin                                   | 1 (1.3)                                                         | 3 (1.4)                      |
| Polymorphous                              | 9 (11.3)                                                        | 14 (6.6)                     |
| <b>Pigmented<br/>structures, n (%)</b>    |                                                                 |                              |
| Blue-gray ovoid<br>globules               | 23 (28.8)                                                       | 81 (38.2)                    |
| Multiple Dots                             | 15 (18.8)                                                       | 50 (23.6)                    |
| Spoke-Wheel                               | 0                                                               | 9 (4.2)                      |
| Leaf-like                                 | 0                                                               | 10 (4.7)                     |
| Concentric                                | 0                                                               | 6 (2.8)                      |
| <b>Pigmentation<br/>intensity, n (%)</b>  |                                                                 |                              |
| None                                      | 49 (61.3)                                                       | 115 (54.3)                   |
| Light (<10%)                              | 18 (22.5)                                                       | 44 (20.8)                    |
| Partial (10%-50%)                         | 5 (6.25)                                                        | 24 (11.3)                    |
| Heavy (>50%)                              | 8 (10)                                                          | 29 (13.7)                    |
| <b>Pink-whitish<br/>background, n (%)</b> | 50 (62.5)                                                       | 140 (66)                     |
| <b>Diffuse white color,<br/>n (%)</b>     | 8 (10)                                                          | 10 (4.7)                     |



|                                               |           |           |
|-----------------------------------------------|-----------|-----------|
| <b>White shiny lines, n (%)</b>               | 45 (56.3) | 98 (46.2) |
| <b>Multiple yellow-white globules, n (%)</b>  | 11 (13.8) | 27 (12.7) |
| <b>White circles &amp; Yellow Clods, n(%)</b> | 24 (30)   | 55 (25.9) |
| <b>Ulceration, n (%)</b>                      |           |           |
| None                                          | 10 (12.5) | 44 (20.8) |
| Erosions                                      | 12 (15)   | 41 (19.3) |
| Prominent                                     | 37 (46.3) | 96 (45.3) |
| >90%                                          | 21 (26.2) | 31 (14.6) |

**Table S9. Aggressive histologic subtypes of BCC, n=80 (%)**

| <b>Infiltrative</b> | <b>Morpheaform</b> | <b>Basosquamous</b> | <b>Micro-nodular</b> | <b>Mixed</b> |
|---------------------|--------------------|---------------------|----------------------|--------------|
| 42 (52.5%)          | 1 (1.3%)           | 14 (17.5)           | 2 (2.5%)             | 21 (26.3%)   |
